# Supplementary material for: Caveolin-2 is regulated by BRD4 and contributes to cell growth in pancreatic cancer
Source: PubMed Central journal article supplement (PMC7029443; doi:10.1186/s12935-020-1135-0), 2020-02-18

# GO Classification

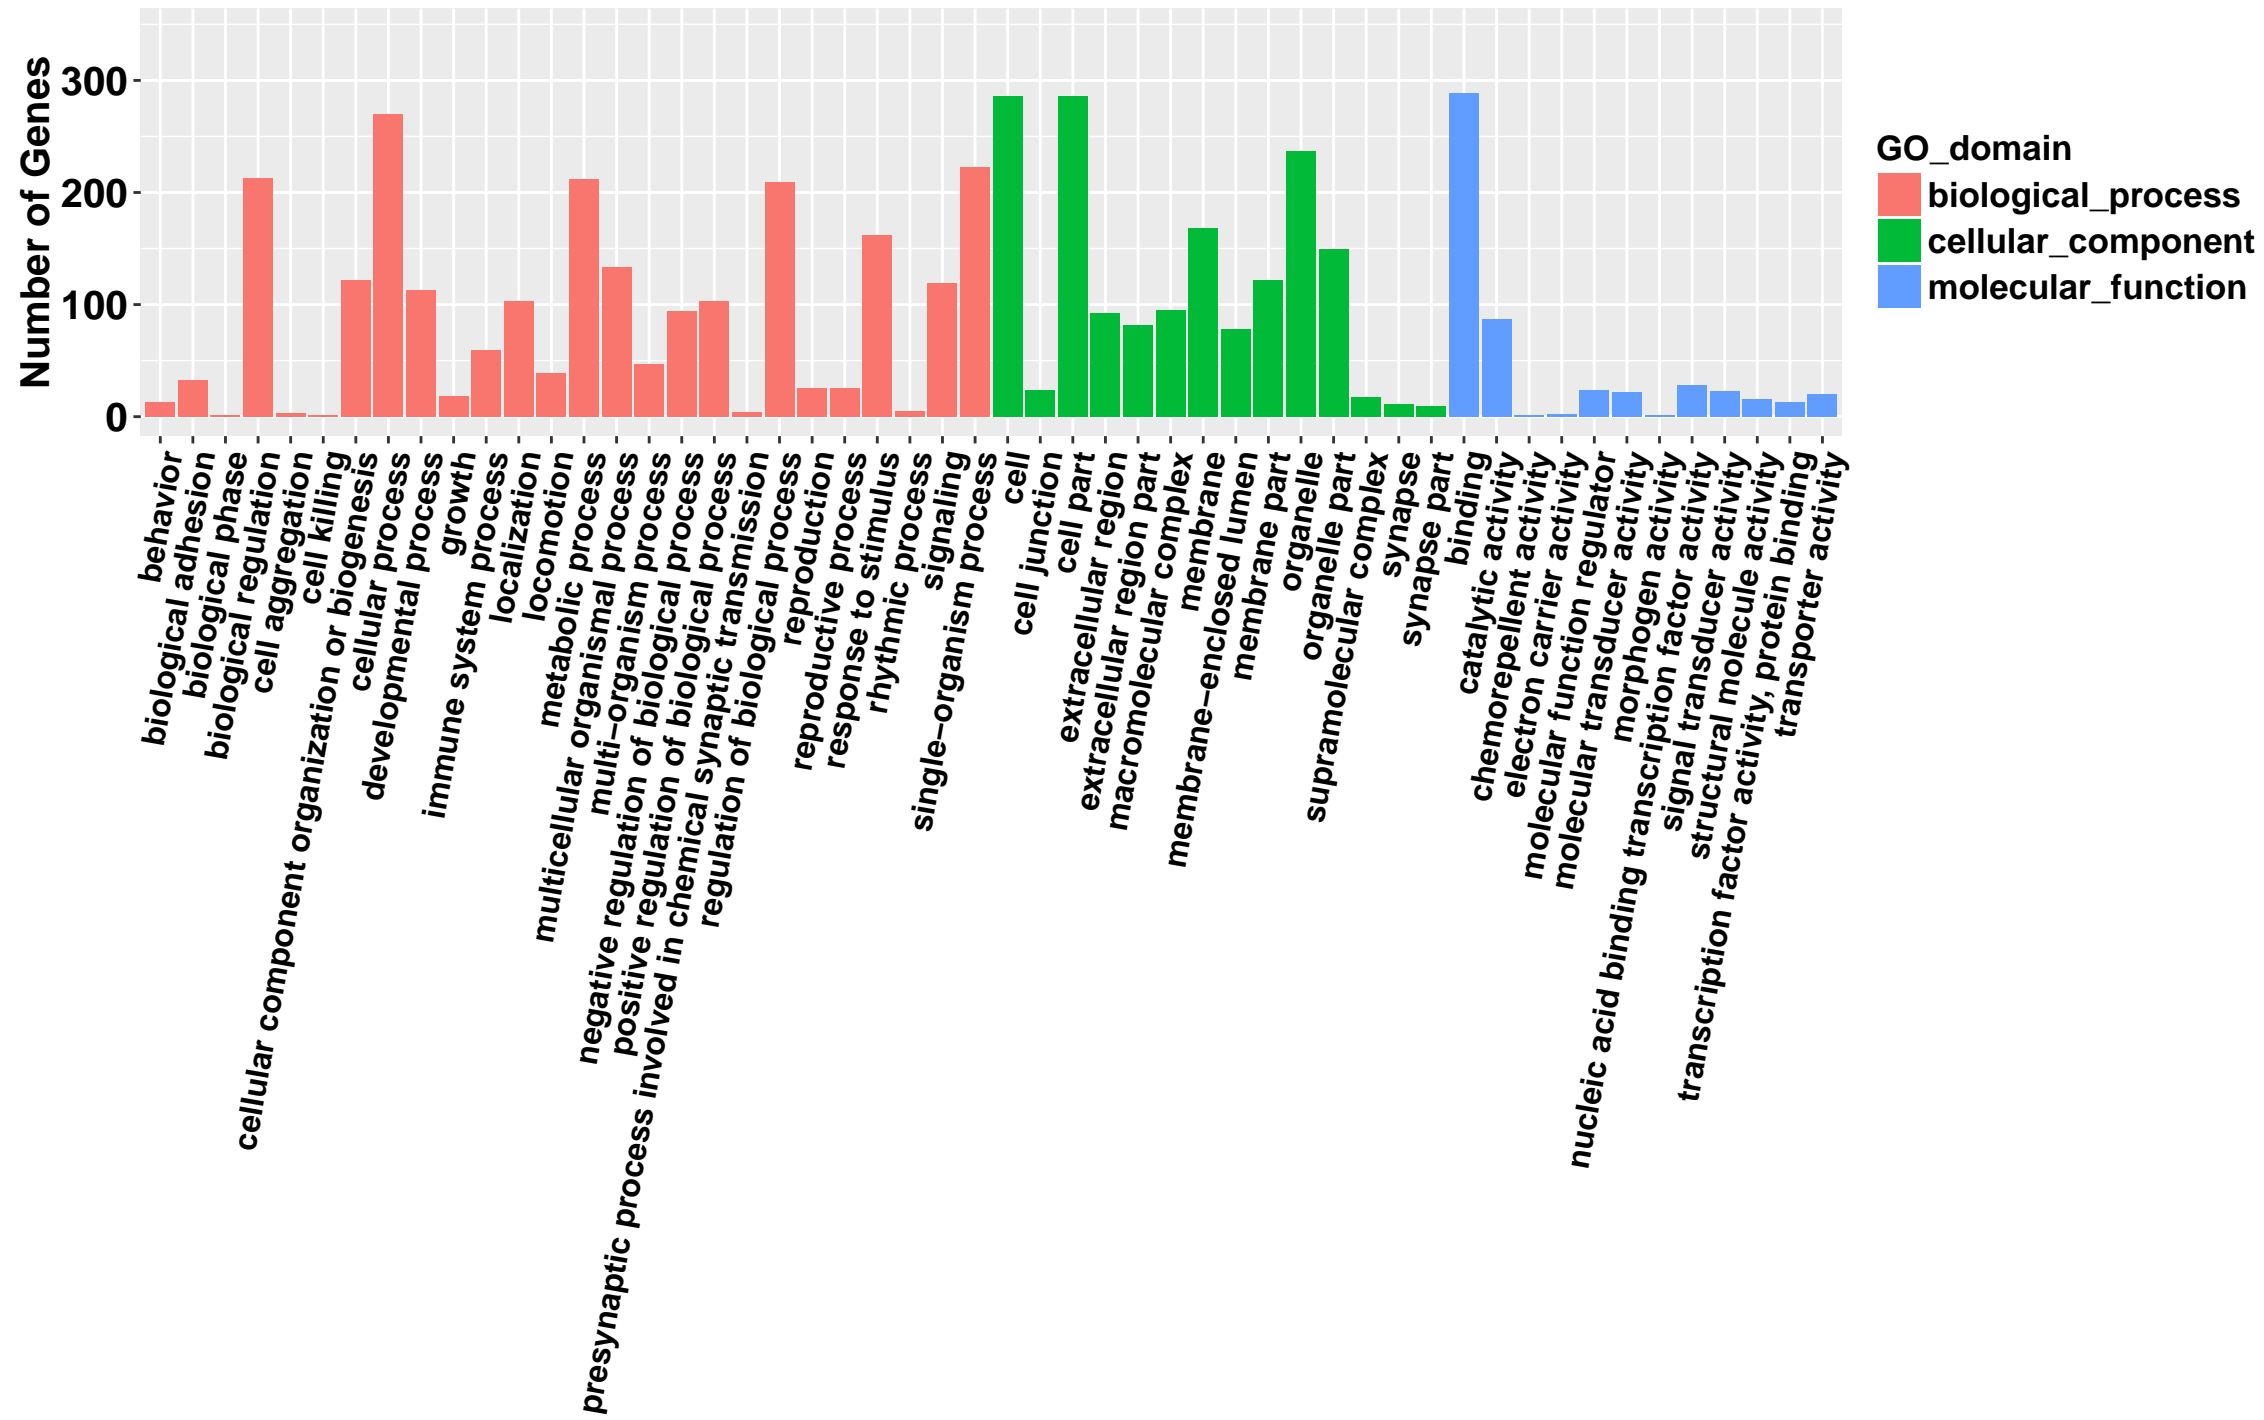

Supplement: 12935_2020_1135_MOESM3_ESM.pdf [file 12935_2020_1135_MOESM3_ESM.pdf]
